# Supplementary material
Source: publisher figshare collection journal article supplement (https://tandf.figshare.com/ndownloader/files/23133215)
Supplement: Supplementary file 1 [file 23133215]

**
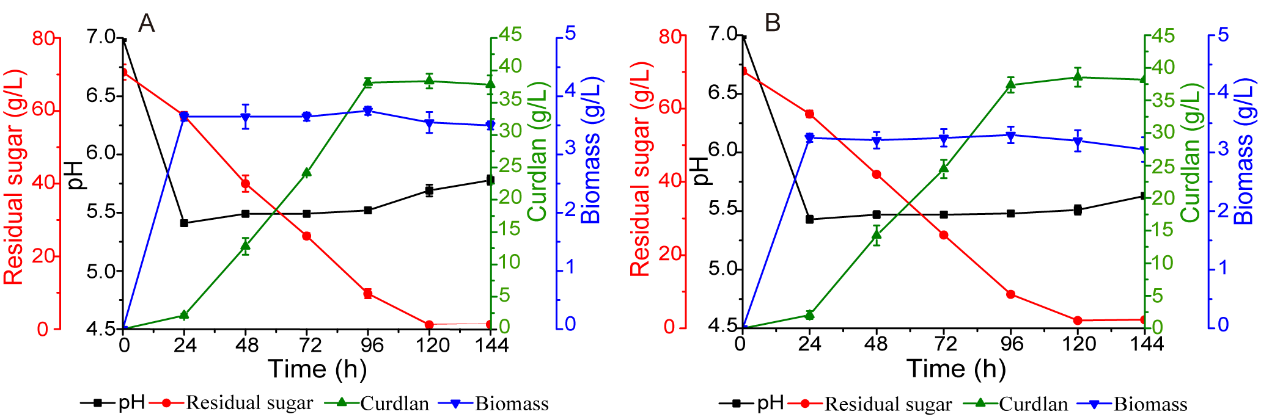
**

Supplemental Fig. 1 The time courses of curdlan fermentation using sucrose (A) and maltose (B) as carbon source
